# Supplementary material
Source: PubMed Central journal article supplement (PMC2872268)
Supplement: mmc1.pdf [file mmc1.pdf]

Biophysical Journal, Volume 98

**Supporting Material**

**Structure-function perturbation and dissociation of tetrameric urate oxidase by high hydrostatic pressure**

Eric Girard, Stephane Marchal, Javier Perez, Stephanie Finet, Richard Kahn, Roger Fourme, Guillaume Marassio, Anne-Claire Dhaussy, Thierry Prange, Marion Giffard, Fabienne Dulin, Françoise Bonnete, Reinhard Lange, Jacques H. Abraini, Mohamed Mezouar, and Nathalie Colloc'h

## **Supporting Materials**

### **Structure-function perturbation and dissociation of tetrameric urate oxidase by high hydrostatic pressure**

Eric Girard, Stéphane Marchal, Javier Perez, Stéphanie Finet, Richard Kahn, Roger Fourme, Guillaume Marassio, Anne-Claire Dhaussy, Thierry Prangé, Marion Giffard, Fabienne Dulin, Françoise Bonneté, Reinhard Lange, Jacques H. Abraini, Mohamed Mezouar and Nathalie Colloc'h.

## **MATERIAL AND METHODS**

### **Enzyme assays and kinetics**

Activity was measured at atmospheric pressure after overnight incubation at high pressure. Apo-UOX was incubated for 20 hours at specified pressures up to 200 MPa. After decompression, samples were centrifuged to remove the precipitate and the remaining soluble protein fraction was estimated by UV absorbance at 280 nm, using an extinction coefficient of  $1.69 \text{ mg}^{-1} \cdot \text{cm}^{-1}$  (1). UOX activity was determined spectrophotometrically by measuring the initial consumption rate of uric acid (2). UOX ( $1 \text{ } \mu\text{g/ml}$ ) was mixed with  $36 \text{ } \mu\text{M}$  uric acid in  $50 \text{ mM}$  Tris-HCl pH 8 buffer. The variation in uric acid concentration was followed at 292 nm (extinction coefficient of uric acid solution at 292 nm,  $\epsilon_{292} = 12,200 \text{ mol}^{-1} \cdot \text{cm}^{-1}$ ). The initial consumption rate, expressed in  $\text{mol} \cdot \text{min}^{-1}$ , was then normalized by the amount of UOX introduced (in mg) to obtain the specific activity of the enzyme. These measurements were repeated with a substrate concentration of  $150 \text{ } \mu\text{M}$ .

Activity measurements under high pressure, using home-built stopped-flow apparatus (3), were carried out from 0.1 to 190 MPa at 298 K. Equal volumes of enzyme and substrate solutions were mixed in a high-pressure stopped-flow cell connected to a MOS-200 rapid-kinetics optical system from BioLogic (Grenoble, France). All experiments were performed at least in triplicate, with different concentrations of UOX ( $1\text{-}2 \text{ } \mu\text{g/ml}$ ) and substrate ( $36, 54, 72, 110$  and  $150 \text{ } \mu\text{M}$ ).

### **Native molecular mass determination**

The molecular mass of UOX after a 20-hour incubation under pressure (Fig. S2) was determined by gel filtration using a Superose 12 FPLC column (Pharmacia) at  $4^\circ\text{C}$

equilibrated with 50 mM Tris-HCl pH 8 buffer containing 150mM KCl at a rate flow of 0.5ml/min. Samples were centrifuged at 16,000 g for 40 min in order to remove aggregates, and 100µl were loaded onto the column. For calibration, the following molecular mass standards (Sigma) were used: (1) β-amylase (200,000), (2) alcohol dehydrogenase (150,000), (3) albumin (66,000), (4) carbonic anhydrase (29,000), (5) cytochrome C (12,400) and (6) aprotinin (6,500). The void and total volumes of 8 and 20.8 ml, respectively, were determined with cytidine and dextran blue dye for the calculation of the distribution coefficient  $K_{av}$ . As shown in Fig. S2, the molecular mass of pressure-treated UOX, 134 kDa, is not significantly different from that of native UOX (135 kDa).

### **SAXS experiments**

Data were collected using a FReLoN (Fast-Readout, Low-Noise) CCD detector based on the Kodak KAF-4320 image sensor (512x512 pixels after 4x4 binning). The sample to detector distance was set at 1.73 m. The exposure time per frame was 0.3 s. Under each condition, 4 frames were recorded for the protein and 20 frames for the buffer. No radiation damage was observed. Data reduction is described in (4).

Various experiments were done at three protein concentrations: 17, 8.5 and 4.25 mg.ml<sup>-1</sup>, in 10 mM sodium phosphate buffer, pH 8, either without inhibitor or with 8-aza in saturating concentrations.

### **HPMX experiments and structure comparisons**

Data were integrated using *XDS* (5). Integrated intensities were scaled and merged using *SCALA* and refinements were carried out with *REFMAC* (6) both from the *CCP4* package (7). The graphics program *O* (8) was used to visualize the  $(2F_{obs} - F_{calc})$  and  $(F_{obs} - F_{calc})$  electron-density maps and for manual refitting.

### **REFERENCES**

1. Conley, T. G. and D. G. Priest. 1980. Thermodynamics and stoichiometry of the binding of substrate analogues to uricase. *Biochem. J.* 187:727-732.

2. Amounas, M., V. Magne, C. Innocent, E. Dejean, and P. Seta. 2002. Elaboration and chemical reactivity of enzyme modified ion exchanging textiles. *Enzyme and Microbiol. Technol.* 31:171-178.
3. Balny, C., J. L. Saldana, and N. Dahan. 1984. High-pressure stopped-flow spectrometry at low temperatures. *Anal Biochem* 139:178-189.
4. Bösecke, P. 2007. Reduction of two-dimensional small- and wide-angle X-ray scattering data. *J. Appl. Cryst.* 40:s423-s427.
5. Kabsch, W. 1993. Automatic processing of rotation diffraction data from crystals of initially unknown symmetry and cell constants. *J. Appl. Cryst.* 26:795-800.
6. Murshudov, G. N., A. A. Vagin, and E. J. Dodson. 1997. Refinement of macromolecular structures by the Maximum-Likelihood method. *Acta Crystallogr.* D53:240-255.
7. Collaborative Computational Project Number 4. 1994. The *CCP4* suite : programs for protein crystallography. *Acta Crystallogr.* D50:760-763.
8. Jones, T. A., J. Y. Zou, S. W. Cowan, and M. Kjeldgaard. 1991. Improved methods for building protein models in electron density maps and the location of errors in these models. *Acta Crystallogr.* A47:110-119.

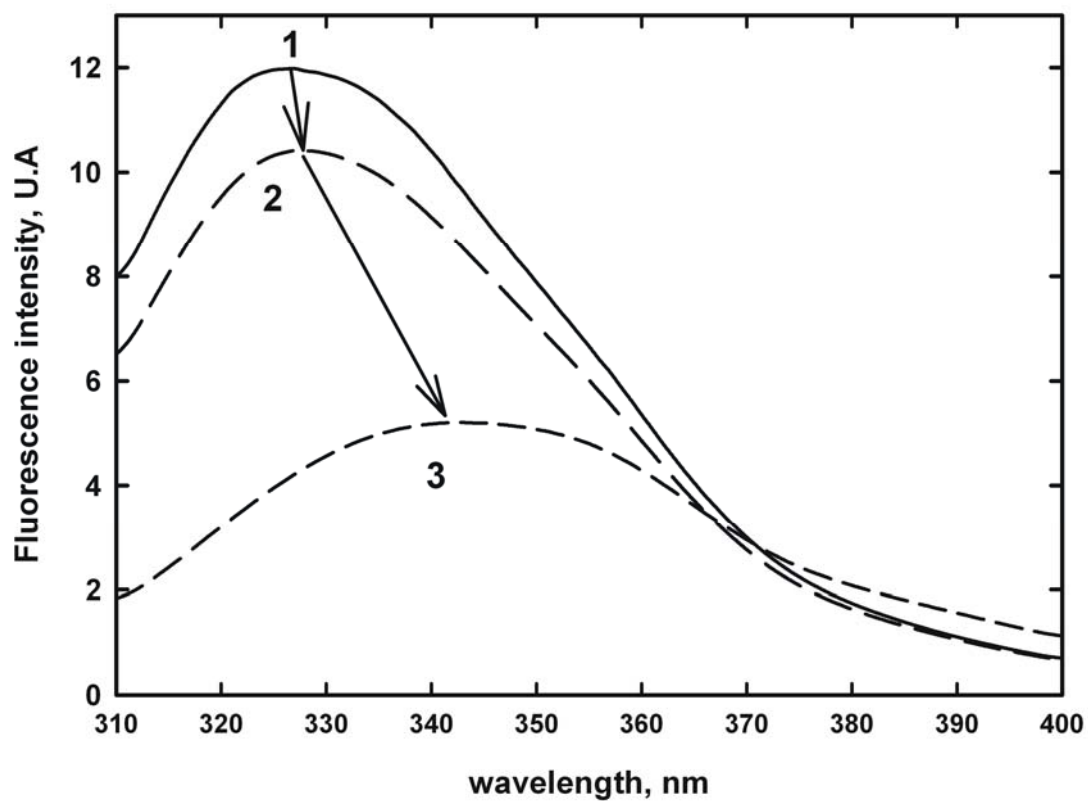

**Figure S1.** Representative view of apo-UOX fluorescence emission upon excitation at 295 nm as a function of hydrostatic pressure: (1) 1 MPa, (2) 150 MPa, (3) 350 MPa.

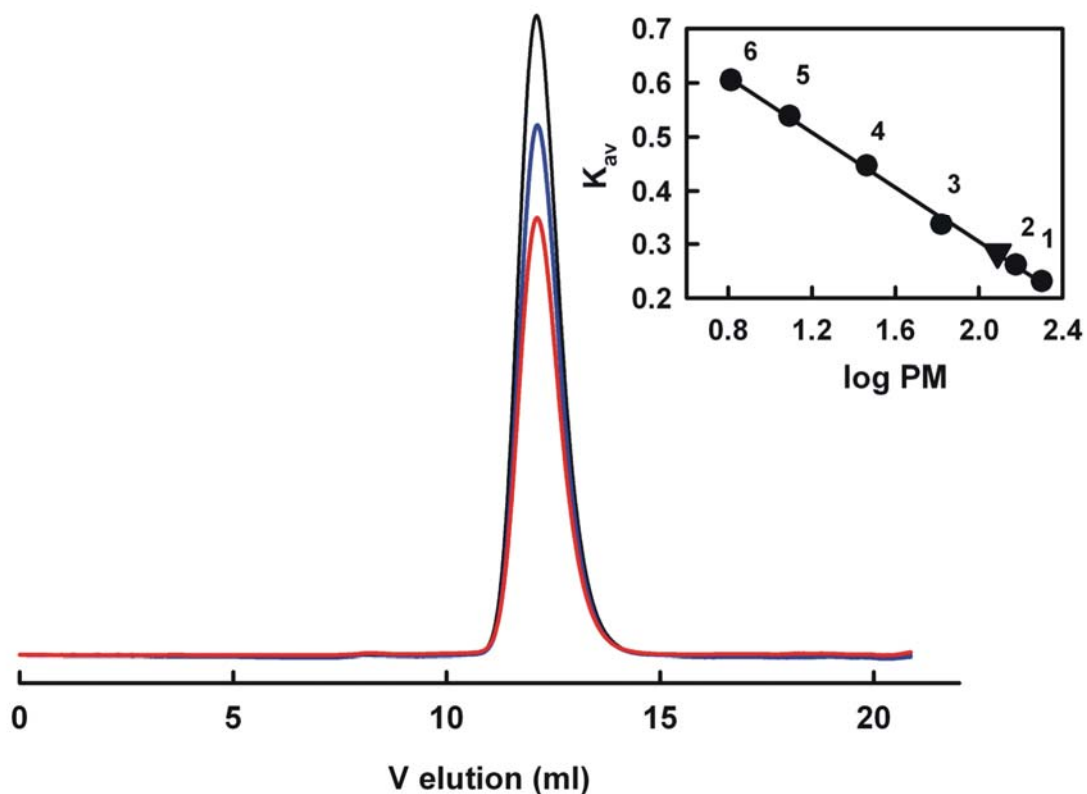

**Figure S2.** Evidence of the tetrameric state of the soluble UOX after pressure treatment. After 20h incubation under pressure (150 MPa (black), 175 MPa (blue), 185 MPa (red)), a sample of 100  $\mu\text{l}$  UOX was applied on a gel-filtration Superose 12 10/300 GL column (Pharmacia). Chromatography was performed at a flow rate of  $0.5\text{ml}\cdot\text{min}^{-1}$ . (*Inset*) The molecular mass of the soluble pressure treated protein was determined using  $\beta$ -amylase, alcohol dehydrogenase, albumin, carbonic anhydrase, cytochrome C and aprotinin as calibration standards ( $\bullet$ ). From the measured distribution coefficient  $K_{av}$  of UOX ( $\blacktriangledown$ ), a molecular mass of 134 kDa was determined.

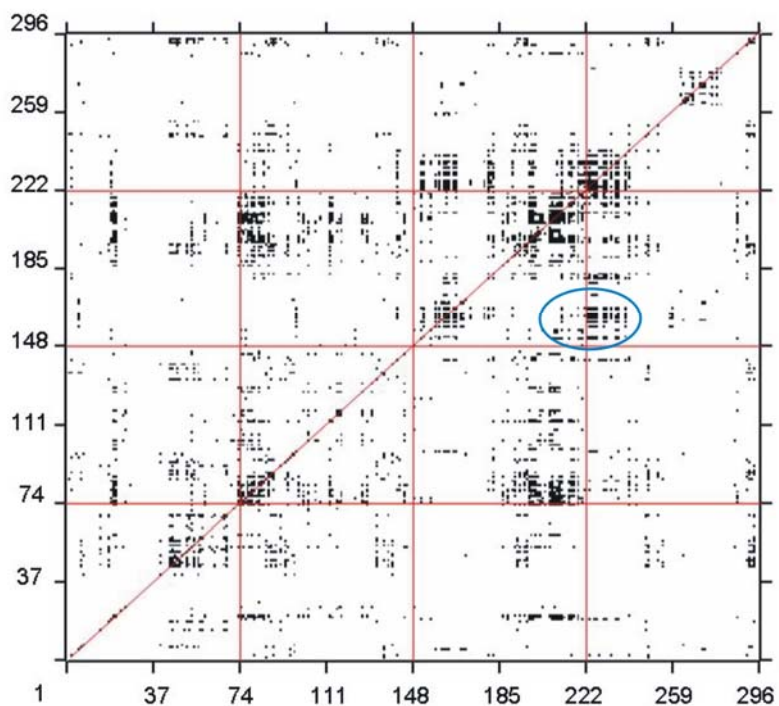

**Figure S3.** Correlation matrix between HP and AP structure, where the correlation factor is higher than 0.9 (very high correlation). A circle highlights correlated displacements between residues belonging to the active site (S154, T155, F159, F162, S226, V227, Q228) and residues belonging to the hydrophobic cavity (V151, L178, T180, V182, T215, F219, V227, T230, M234).

**Table S1.** Crystallographic data collection and refinement statistics.

| <b>Protein</b>                     | <b>Urate oxidase:8-aza complex</b> |                             |
|------------------------------------|------------------------------------|-----------------------------|
| <i>Data collection</i>             |                                    |                             |
| Pressure (MPa)                     | 1                                  | 150                         |
| Temperature (K)                    | 277                                | 277                         |
| Unit cell parameters (Å)           |                                    |                             |
| a                                  | 80.00                              | 79.70                       |
| b                                  | 96.24                              | 95.87                       |
| c                                  | 105.57                             | 104.99                      |
| Resolution range (Å)               | 14.90 - 1.85<br>(1.95 – 1.85)      | 19.94-1.80<br>(1.90 – 1.80) |
| No of unique reflections           | 30808 (4535)                       | 36047 (5232)                |
| R <sub>merge</sub> (%) overall *   | 6.4 (33.1)                         | 5.2 (26.2)                  |
| Completeness (%)                   | 88.4 (89.3)                        | 96.4 (96.6)                 |
| I/σ(I)                             | 8.1 (2.0)                          | 7.4 (2.5)                   |
| Redundancy                         | 2.7 (2.6)                          | 2.7 (2.6)                   |
| <i>Refinements</i>                 |                                    |                             |
| Resolution range (Å)               | 14.77 – 1.85                       | 14.82 – 1.80                |
| R <sub>work</sub> (%) <sup>†</sup> | 17.47                              | 17.80                       |
| R <sub>free</sub> (%) <sup>‡</sup> | 20.46                              | 21.78                       |
| Nb of atoms                        | 2524                               | 2519                        |
| Protein                            | 2370                               | 2368                        |
| Ligand/ion                         | 12                                 | 12                          |
| Water                              | 142                                | 139                         |
| Thermal B factor (Å) <sup>2</sup>  | 19.64                              | 24.53                       |
| Protein                            | 19.24                              | 24.17                       |
| Ligand/ion                         | 14.19                              | 18.56                       |
| Water                              | 26.91                              | 31.27                       |
| r.m.s.d. from ideality             |                                    |                             |
| Bond length (Å)                    | 0.015                              | 0.16                        |
| Bond angle (°)                     | 1.608                              | 1.669                       |

Both structures have an orthorhombic unit cell; space group I222. The highest resolution shell is shown in parentheses. \*R<sub>merge</sub> is defined as  $\sum_{h,k,l} \sum_i |I_i(h,k,l) - \overline{I(h,k,l)}| / \sum_{h,k,l} \sum_i I_i(h,k,l)$  where I<sub>i</sub>(h,k,l) is the i<sup>th</sup> observation of reflection h,k,l and <I(h,k,l)> is the weighted mean of all observations (after rejection of outliers). †R<sub>work</sub> is defined as  $\sum |F_o| - |F_c| / \sum |F_o|$  and indicates the accuracy of the model. ‡R<sub>free</sub> is a cross-validation residual calculated using 5% of the native data which were randomly chosen and excluded from the refinement.
